# Supplementary material for: Diversification of Gene Expression during Formation of Static Submerged Biofilms by Escherichia coli
Source: PubMed Central journal article supplement (PMC5050211; doi:10.3389/fmicb.2016.01568), 2016-10-05
Supplement: Image_2.pdf [file Image_2.pdf]

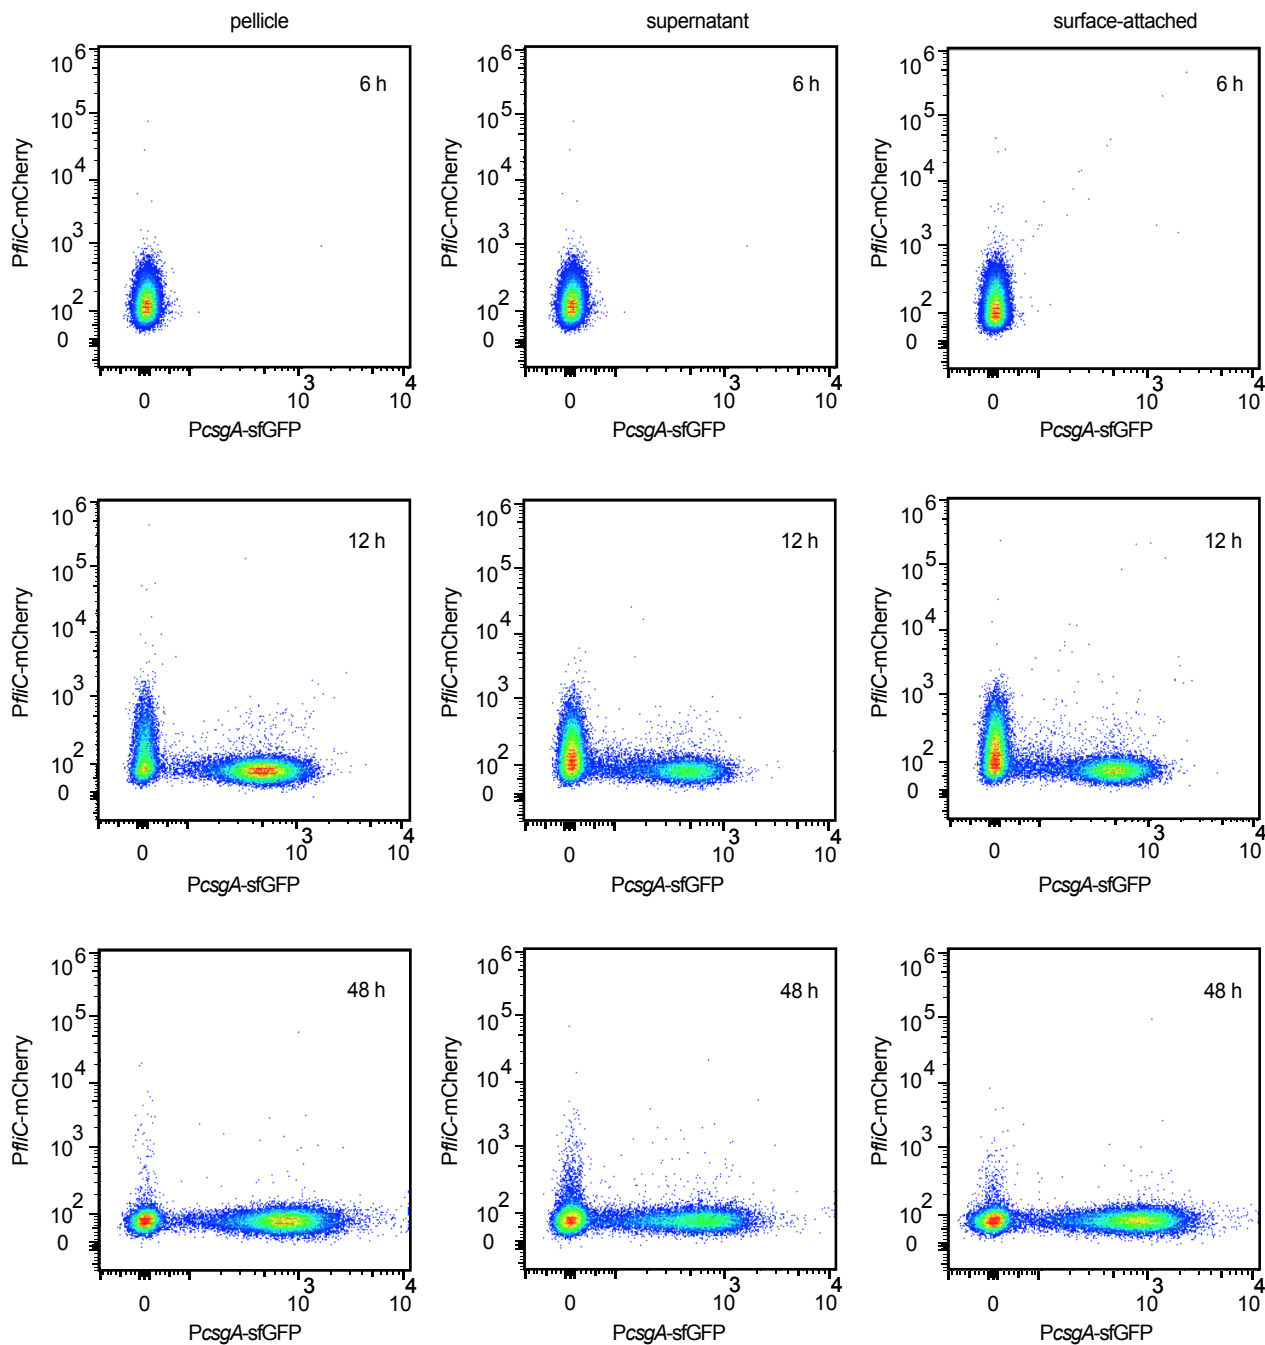

**Supplementary Figure 2. Expression of curli fibers and flagella are anticorrelated throughout the biofilm growth.** Scatter plots showing expression of PcsG A-sfGFP and PflI C-mCherry in the pellicle, supernatant, and surface-attached cells at selected time points, measured by flow cytometry. Expression levels of PcsG A-sfGFP and PflI C-mCherry are plotted on the x-axis and y-axis, respectively. The color scale is as in Figure 4.
