# Supplementary material for: Diversification of Gene Expression during Formation of Static Submerged Biofilms by Escherichia coli
Source: PubMed Central journal article supplement (PMC5050211; doi:10.3389/fmicb.2016.01568), 2016-10-05
Supplement: Image_3.pdf [file Image_3.pdf]

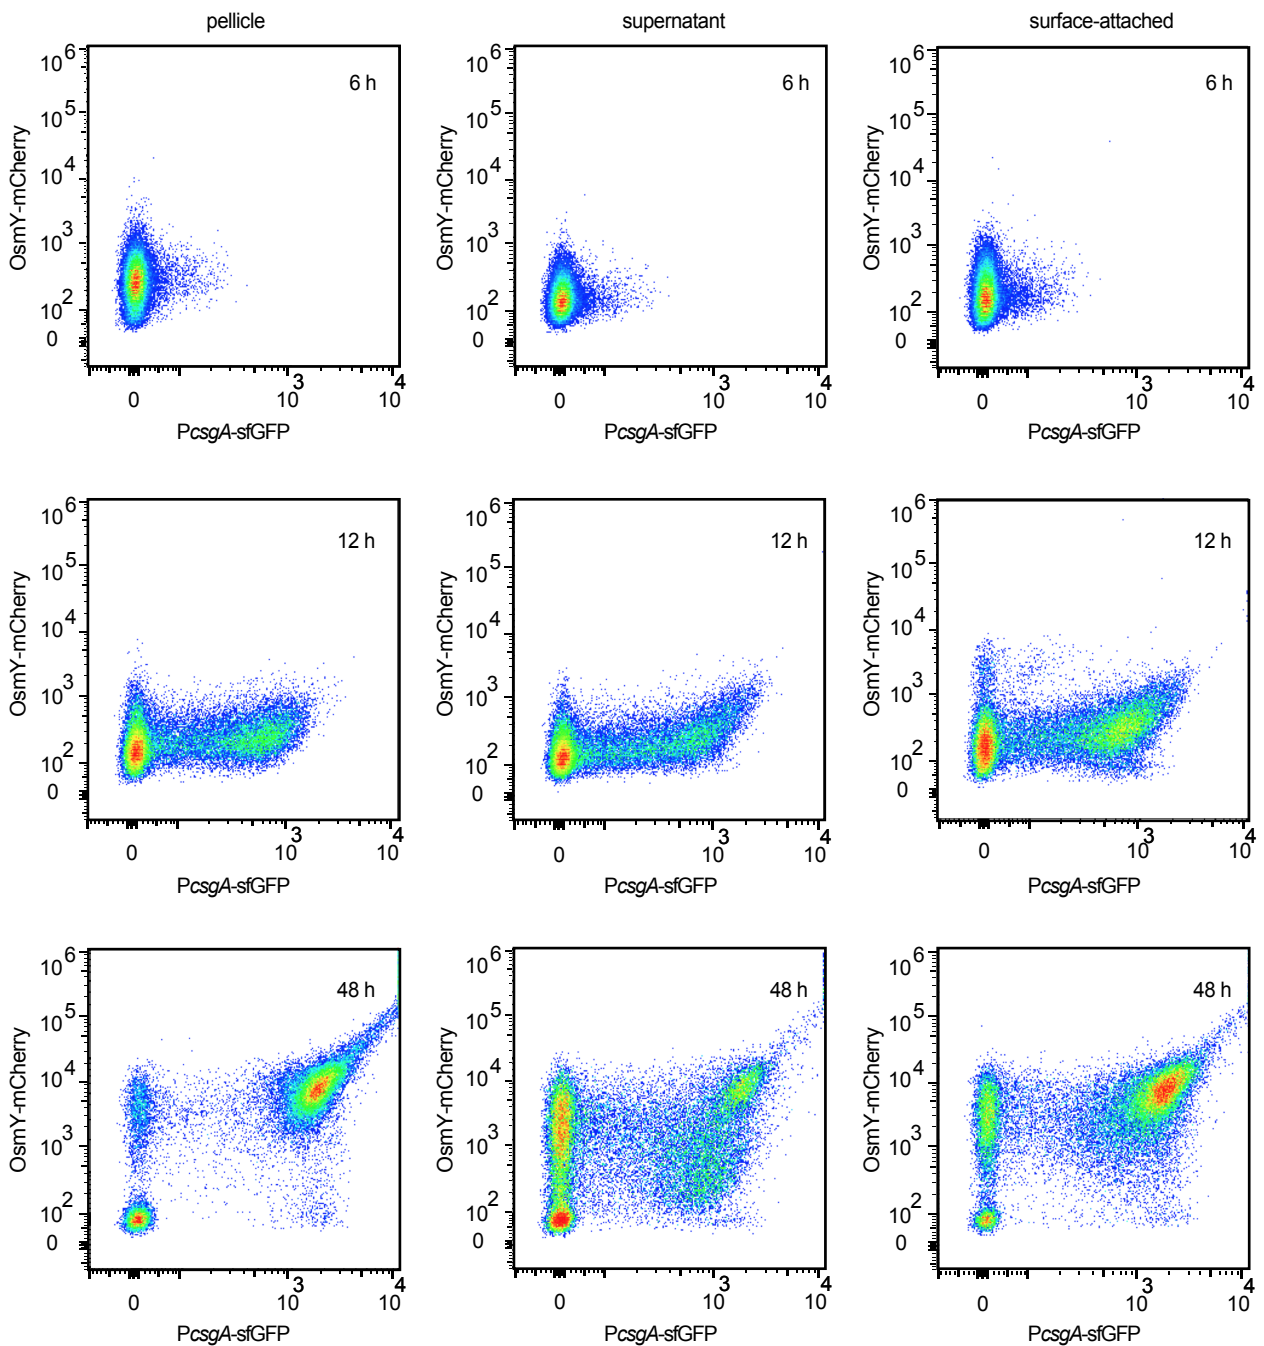

**Supplementary Figure 3. Expression of curli fibers only partially correlates with  $\sigma^S$  activity throughout the biofilm growth.** Scatter plots showing expression of PcsG A-sfGFP and OsmY-mCherry in pellicle, supernatant and surface-attached cells at selected time points by flow cytometry. Expression levels of PcsG A-sfGFP and  $\sigma^S$ -regulated OsmY-mCherry are plotted on the x-axis and y-axis, respectively. The color scale is as in Figure 4.
