# Supplementary material for: Diversification of Gene Expression during Formation of Static Submerged Biofilms by Escherichia coli
Source: PubMed Central journal article supplement (PMC5050211; doi:10.3389/fmicb.2016.01568), 2016-10-05
Supplement: Image_4.pdf [file Image_4.pdf]

(A)

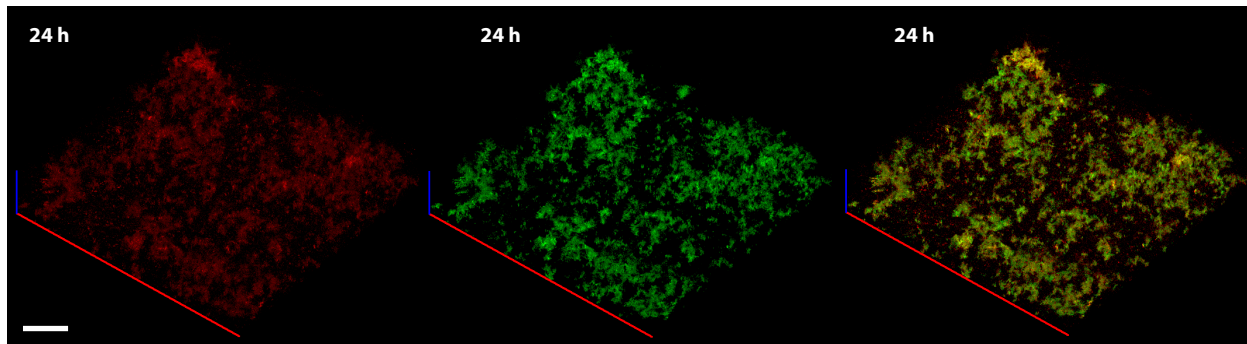

(B)

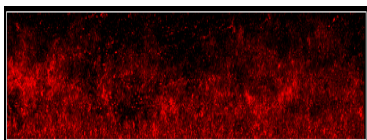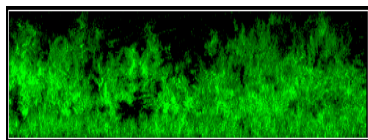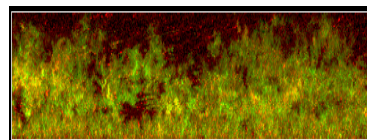

50  $\mu$ m

(C)

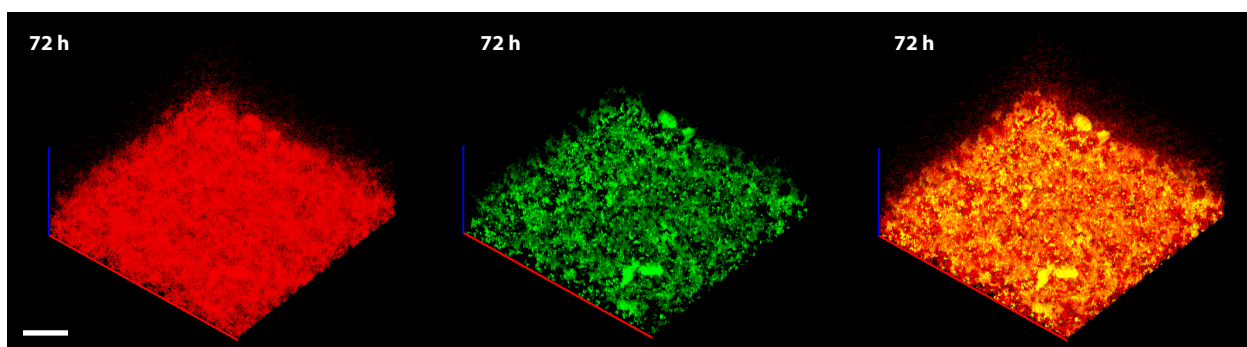

(D)

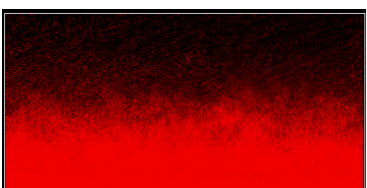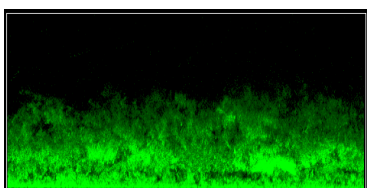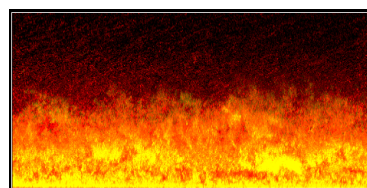

100  $\mu$ m

**Supplementary Figure 4. Restriction of curli expression to biofilm microcolonies cannot be explained by  $\sigma^S$  activity.** A strong increase in  $\sigma^S$  activity can be seen between 24 h (A-B) and 72 h (C-D) of incubation in all biofilm cells, independent on the localization within the biofilm. Scale bars: 40  $\mu$ m.
